# Supplementary material
Source: MDPI journal article supplement (https://www.mdpi.com/2072-4292/13/20/4056)
Supplement: s1 [file s1]

Supporting Information for

**Dielectric properties of lunar materials at  
Chang'E-4 Landing site**

by Lai et al.

**Supplementary Table S1** IDs of LPR CH-2 data.

|     |      |        |     |   |                |                |      |      |
|-----|------|--------|-----|---|----------------|----------------|------|------|
| CE4 | GRAS | LPR-2B | SCI | N | 20190104004000 | 20190109213900 | 0001 | A.2B |
| CE4 | GRAS | LPR-2B | SCI | N | 20190109213901 | 20190111150200 | 0002 | A.2B |
| CE4 | GRAS | LPR-2B | SCI | N | 20190111150201 | 20190112102100 | 0003 | A.2B |
| CE4 | GRAS | LPR-2B | SCI | N | 20190131080301 | 20190201054300 | 0005 | A.2B |
| CE4 | GRAS | LPR-2B | SCI | N | 20190201054301 | 20190208101200 | 0006 | A.2B |
| CE4 | GRAS | LPR-2B | SCI | N | 20190208101201 | 20190209053100 | 0007 | A.2B |
| CE4 | GRAS | LPR-2B | SCI | N | 20190209053101 | 20190209130800 | 0008 | A.2B |
| CE4 | GRAS | LPR-2B | SCI | N | 20190209130801 | 20190210033400 | 0009 | A.2B |
| CE4 | GRAS | LPR-2B | SCI | N | 20190210033401 | 20190211100800 | 0010 | A.2B |
| CE4 | GRAS | LPR-2B | SCI | N | 20190301065101 | 20190301155600 | 0012 | A.2B |
| CE4 | GRAS | LPR-2B | SCI | N | 20190301155601 | 20190302021300 | 0013 | A.2B |
| CE4 | GRAS | LPR-2B | SCI | N | 20190302131101 | 20190302160000 | 0016 | A.2B |
| CE4 | GRAS | LPR-2B | SCI | N | 20190303052101 | 20190303100000 | 0018 | A.2B |
| CE4 | GRAS | LPR-2B | SCI | N | 20190310092701 | 20190311064400 | 0020 | A.2B |
| CE4 | GRAS | LPR-2B | SCI | N | 20190311064401 | 20190312052700 | 0021 | A.2B |
| CE4 | GRAS | LPR-2B | SCI | N | 20190312052701 | 20190312110000 | 0022 | A.2B |
| CE4 | GRAS | LPR-2B | SCI | N | 20190329122801 | 20190331080000 | 0023 | A.2B |
| CE4 | GRAS | LPR-2B | SCI | N | 20190409110001 | 20190411050000 | 0032 | A.2B |
| CE4 | GRAS | LPR-2B | SCI | N | 20190428060001 | 20190429153000 | 0033 | A.2B |
| CE4 | GRAS | LPR-2B | SCI | N | 20190430080001 | 20190501120000 | 0034 | A.2B |
| CE4 | GRAS | LPR-2B | SCI | N | 20190508070001 | 20190509073000 | 0036 | A.2B |
| CE4 | GRAS | LPR-2B | SCI | N | 20190509080001 | 20190509110000 | 0037 | A.2B |
| CE4 | GRAS | LPR-2B | SCI | N | 20190528000001 | 20190528080000 | 0039 | A.2B |
| CE4 | GRAS | LPR-2B | SCI | N | 20190529070001 | 20190529100000 | 0040 | A.2B |
| CE4 | GRAS | LPR-2B | SCI | N | 20190529100001 | 20190529120000 | 0041 | A.2B |
| CE4 | GRAS | LPR-2B | SCI | N | 20190530070001 | 20190530160000 | 0042 | A.2B |
| CE4 | GRAS | LPR-2B | SCI | N | 20190607030001 | 20190609140000 | 0043 | A.2B |
| CE4 | GRAS | LPR-2B | SCI | N | 20190627040001 | 20190628070000 | 0044 | A.2B |
| CE4 | GRAS | LPR-2B | SCI | N | 20190706073001 | 20190707040000 | 0047 | A.2B |
| CE4 | GRAS | LPR-2B | SCI | N | 20190707110001 | 20190708050000 | 0048 | A.2B |
| CE4 | GRAS | LPR-2B | SCI | N | 20190726000001 | 20190727080000 | 0049 | A.2B |
| CE4 | GRAS | LPR-2B | SCI | N | 20190728010001 | 20190729020000 | 0050 | A.2B |
| CE4 | GRAS | LPR-2B | SCI | N | 20190805020001 | 20190805050000 | 0052 | A.2B |
| CE4 | GRAS | LPR-2B | SCI | N | 20190805050001 | 20190806120000 | 0053 | A.2B |
| CE4 | GRAS | LPR-2B | SCI | N | 20190825003001 | 20190825053000 | 0054 | A.2B |
| CE4 | GRAS | LPR-2B | SCI | N | 20190827060001 | 20190827100000 | 0060 | A.2B |
| CE4 | GRAS | LPR-2B | SCI | N | 20190903020001 | 20190903123000 | 0061 | A.2B |
| CE4 | GRAS | LPR-2B | SCI | N | 20190904153001 | 20190905083000 | 0067 | A.2B |
| CE4 | GRAS | LPR-2B | SCI | N | 20190923090001 | 20190923110000 | 0068 | A.2B |
| CE4 | GRAS | LPR-2B | SCI | N | 20191023023001 | 20191024073000 | 0091 | A.2B |
| CE4 | GRAS | LPR-2B | SCI | N | 20191025020001 | 20191025073000 | 0092 | A.2B |
| CE4 | GRAS | LPR-2B | SCI | N | 20191101060001 | 20191103033000 | 0094 | A.2B |
| CE4 | GRAS | LPR-2B | SCI | N | 20191121083001 | 20191124031500 | 0095 | A.2B |
| CE4 | GRAS | LPR-2B | SCI | N | 20191201011501 | 20191202054500 | 0097 | A.2B |
| CE4 | GRAS | LPR-2B | SCI | N | 20191221030501 | 20191221123000 | 0099 | A.2B |

|     |      |        |     |   |                |                |      |      |
|-----|------|--------|-----|---|----------------|----------------|------|------|
| CE4 | GRAS | LPR-2B | SCI | N | 20191222124001 | 20191223083000 | 0102 | A.2B |
| CE4 | GRAS | LPR-2B | SCI | N | 20191230143501 | 20191231062000 | 0108 | A.2B |
| CE4 | GRAS | LPR-2B | SCI | N | 20191231080001 | 20191231120000 | 0109 | A.2B |
| CE4 | GRAS | LPR-2B | SCI | N | 20191231133001 | 20200101041000 | 0111 | A.2B |
| CE4 | GRAS | LPR-2B | SCI | N | 20200120021001 | 20200120084000 | 0112 | A.2B |
| CE4 | GRAS | LPR-2B | SCI | N | 20200121015001 | 20200121142500 | 0113 | A.2B |
| CE4 | GRAS | LPR-2B | SCI | N | 20200218022501 | 20200219023000 | 0119 | A.2B |
| CE4 | GRAS | LPR-2B | SCI | N | 20200219074001 | 20200220102000 | 0120 | A.2B |
| CE4 | GRAS | LPR-2B | SCI | N | 20200228070001 | 20200229091000 | 0122 | A.2B |
